# Supplementary material
Source: MDPI journal article supplement (https://www.mdpi.com/1424-8247/15/1/77)

# **SUPPLEMENTARY INFORMATION**

## **The first dimeric derivatives of the glycopeptide antibiotic teicoplanin**

Ilona Bereczki, Zsolt Szűcs, Gyula Batta, Tamás Milán Nagy, Eszter Ostorházi,  
Katalin E. Kövér, Anikó Borbás and Pál Herczegh

## Table of content

|                                                                |    |
|----------------------------------------------------------------|----|
| NMR and MS spectra of compound <b>6</b> .....                  | 3  |
| NMR and MS spectra of compound <b>7</b> .....                  | 4  |
| NMR spectra of compound <b>8</b> .....                         | 6  |
| HSQC spectra (400 MHz) and HPLC-MS of compound <b>12</b> ..... | 7  |
| HSQC (400 MHz) and MS spectra of compound <b>13</b> .....      | 9  |
| MS spectrum of compound <b>14</b> .....                        | 11 |
| HPLC-MS of compound <b>16</b> .....                            | 12 |
| HPLC-MS of compound <b>17</b> .....                            | 13 |
| MS spectrum of compound <b>20</b> .....                        | 14 |

## NMR and MS spectra of compound 6

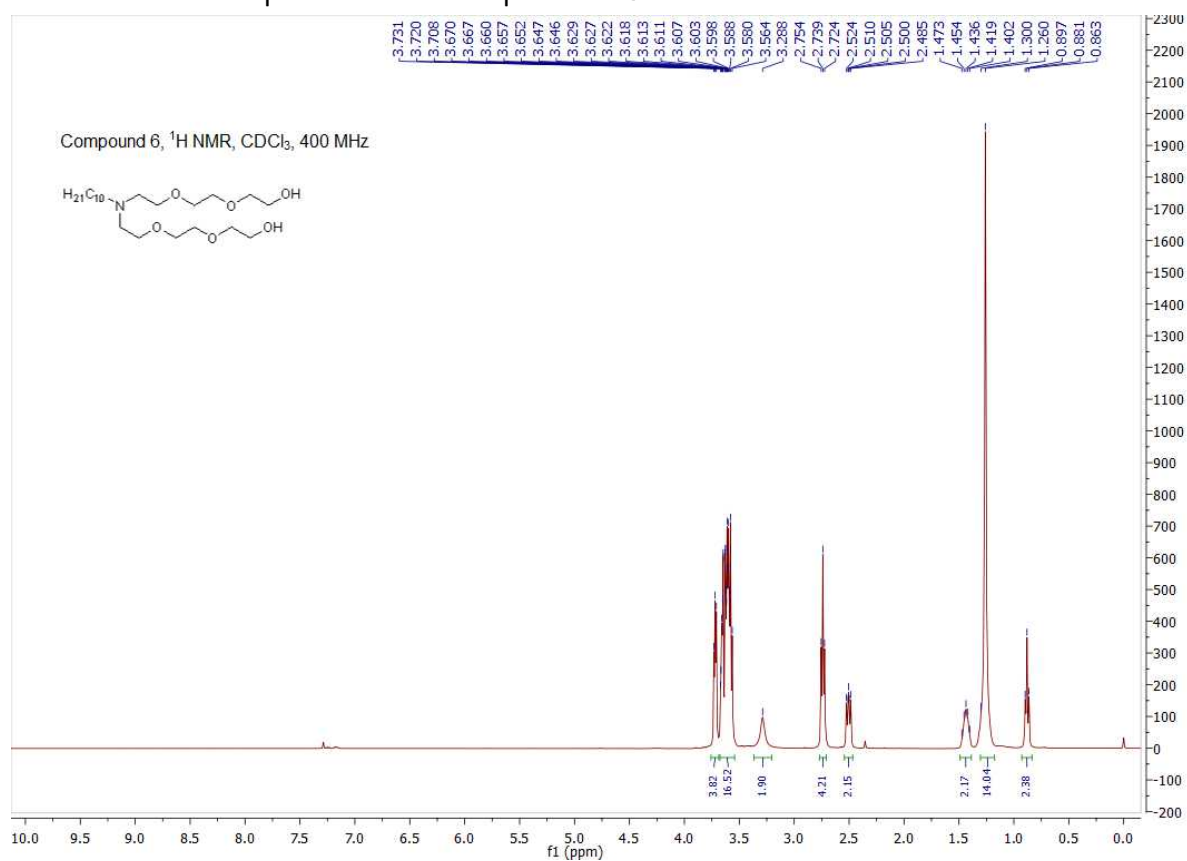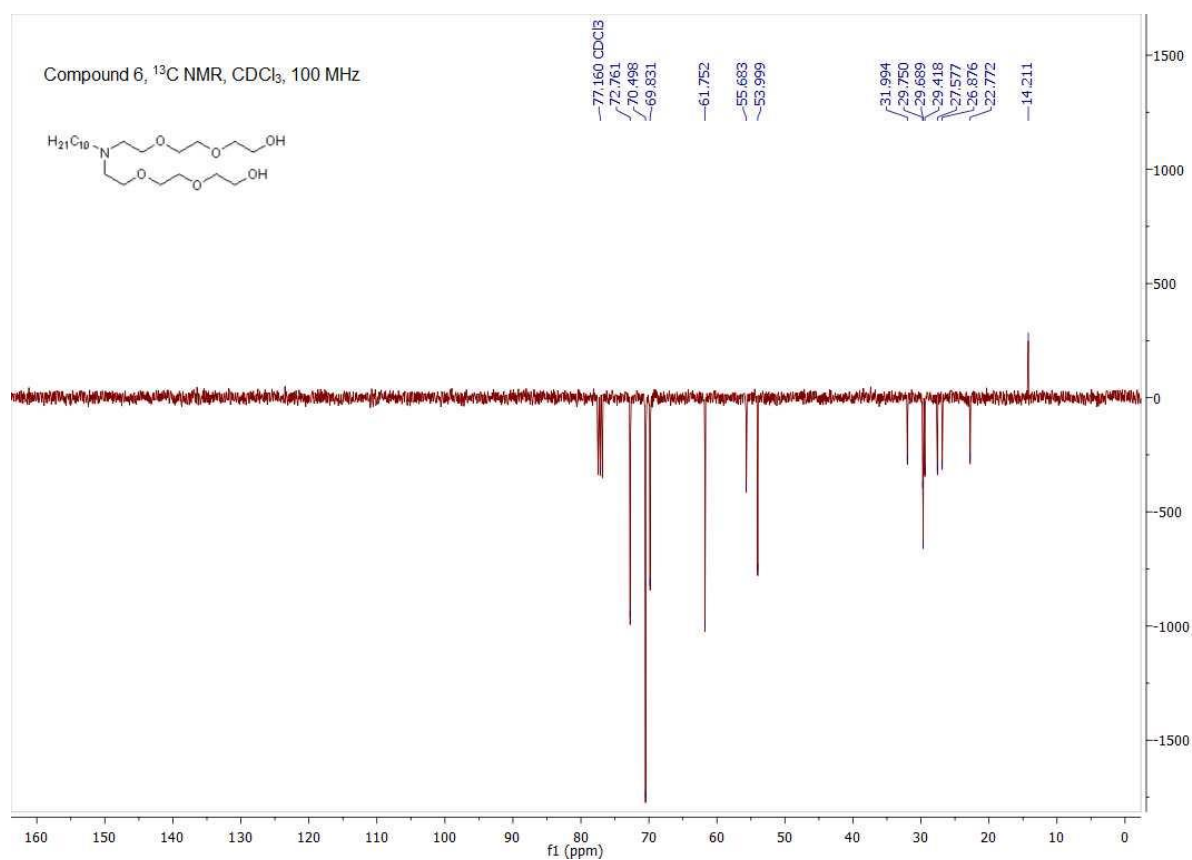

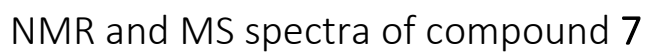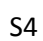

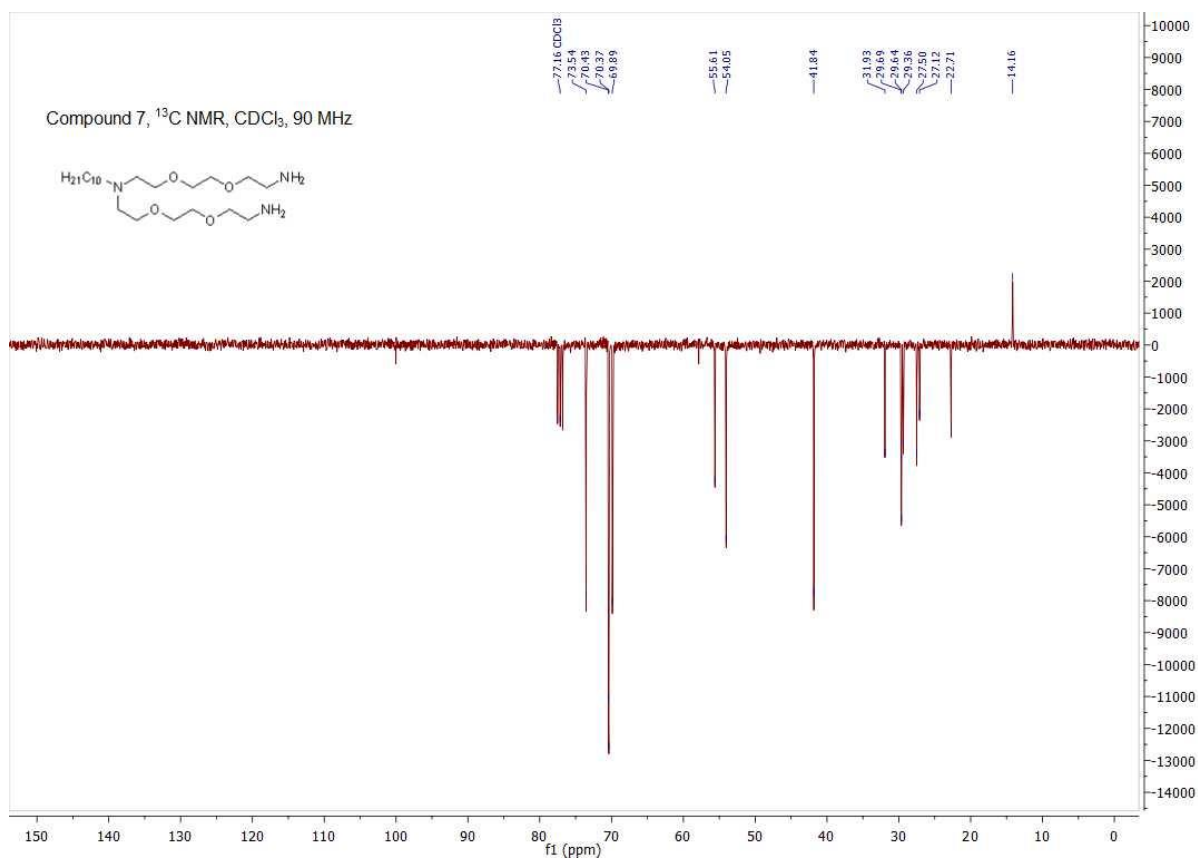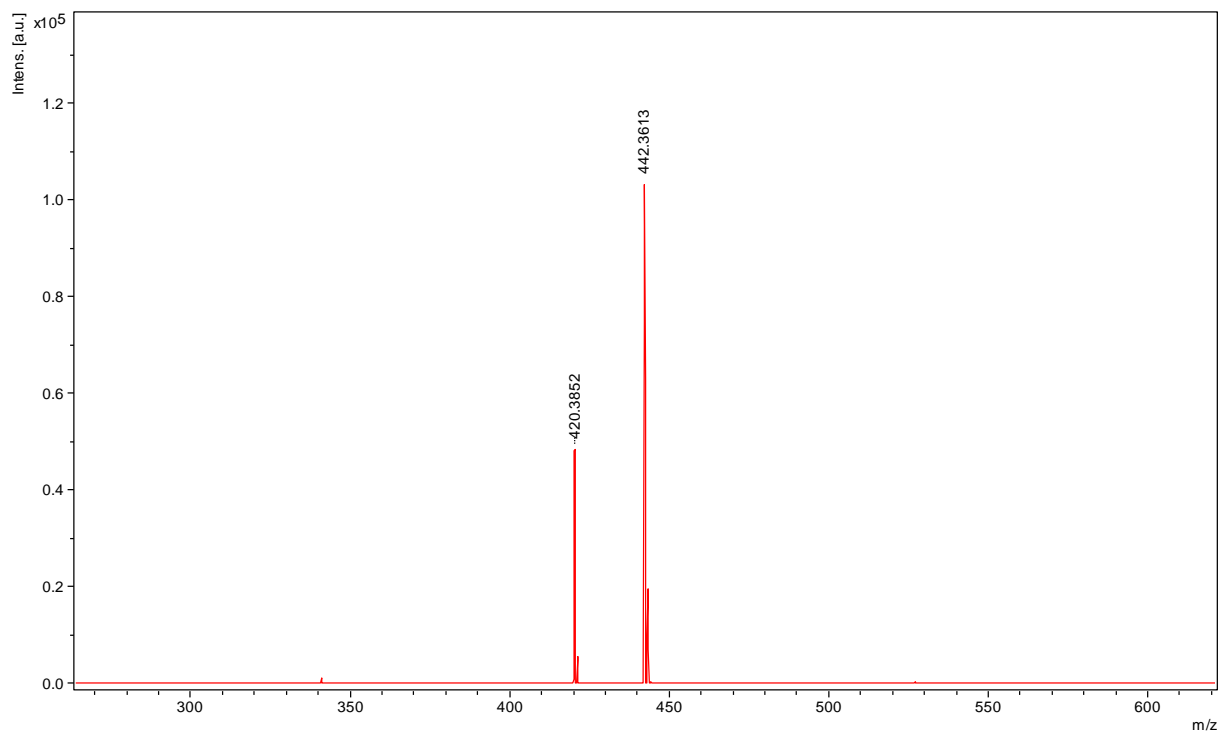

Compound 8,  $^1\text{H}$  NMR,  $\text{CDCl}_3$ , 360 MHz

SCN(CCCOCC)CC(CCCOCC)CC(CCCOCC)NCS

$^1\text{H}$  NMR spectrum (360 MHz,  $\text{CDCl}_3$ ) of Compound 8. The spectrum shows several peaks in the aliphatic region (0.8-3.7 ppm) and a small peak at 7.2 ppm. Integration values are provided below the peaks: 15.88, 3.97, 3.95, 1.98, 2.05, 14.10, and 2.97. A list of chemical shifts (ppm) is shown at the top: 3.72, 3.70, 3.69, 3.69, 3.68, 3.67, 3.66, 3.66, 3.64, 3.63, 3.62, 3.61, 3.58, 3.56, 3.54, 2.75, 2.71, 2.53, 2.51, 2.50, 2.50, 2.48, 2.36, 1.48, 1.46, 1.43, 1.41, 1.40, 1.32, 1.30, 1.28, 1.26, 1.23, 1.21, 1.08, 0.86.

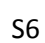

## HSQC spectra (400 MHz) and HPLC-MS of compound **12**

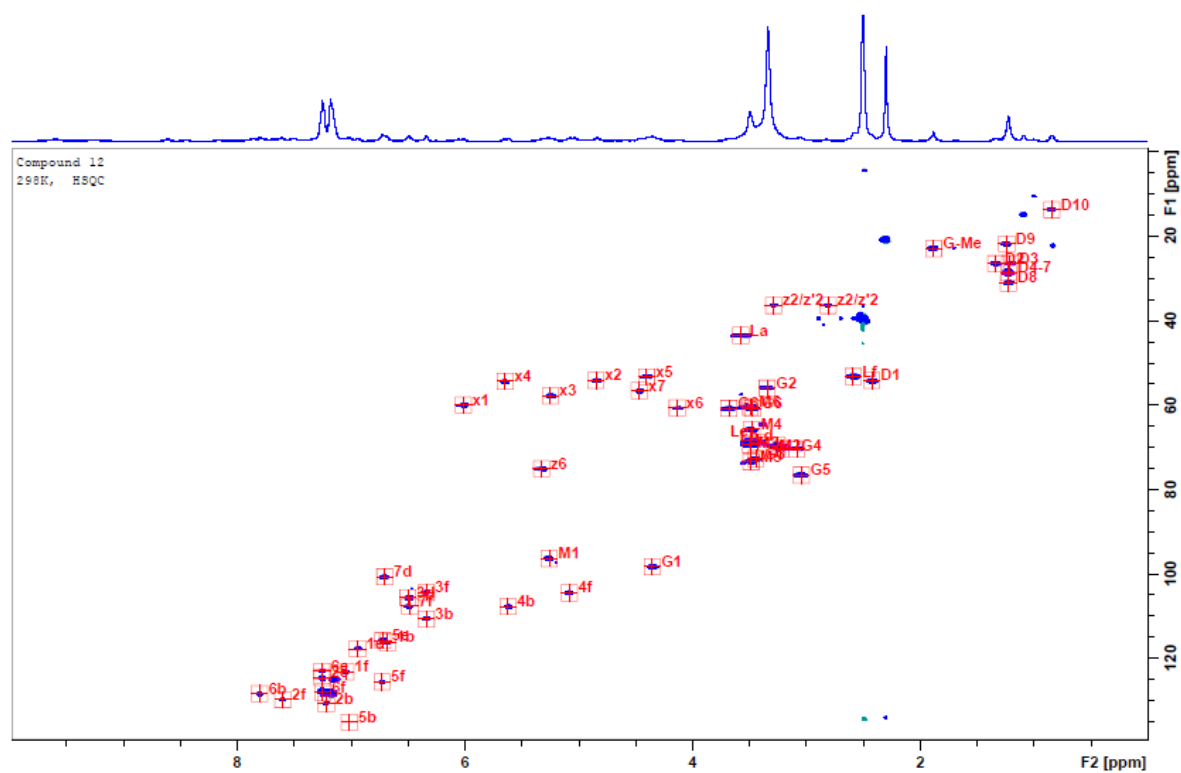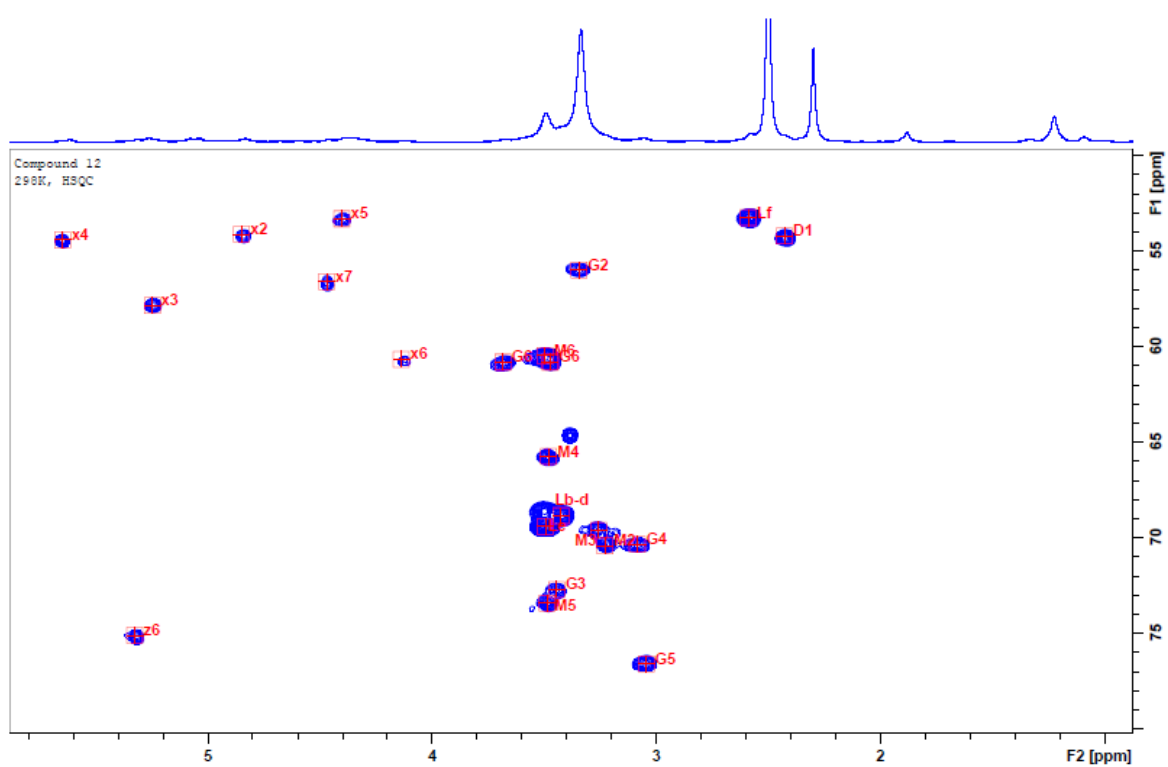

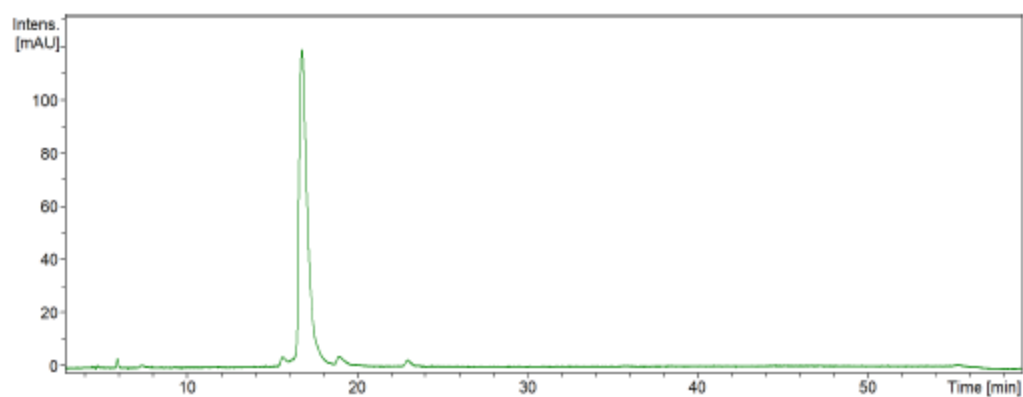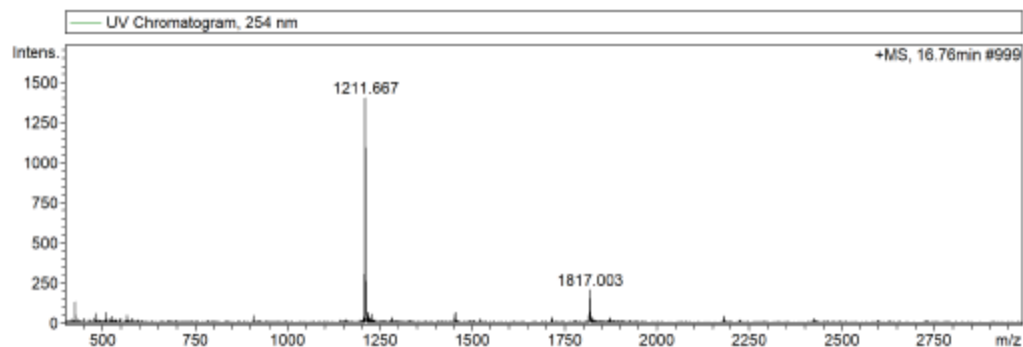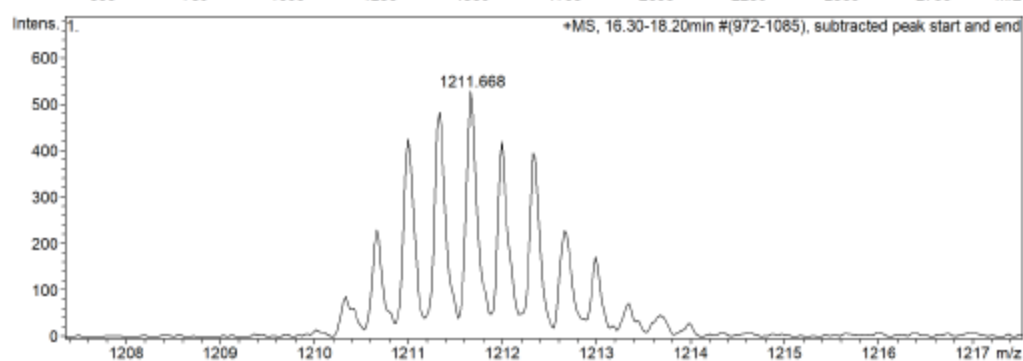



# HSQC (400 MHz) and MS spectra of compound **13**

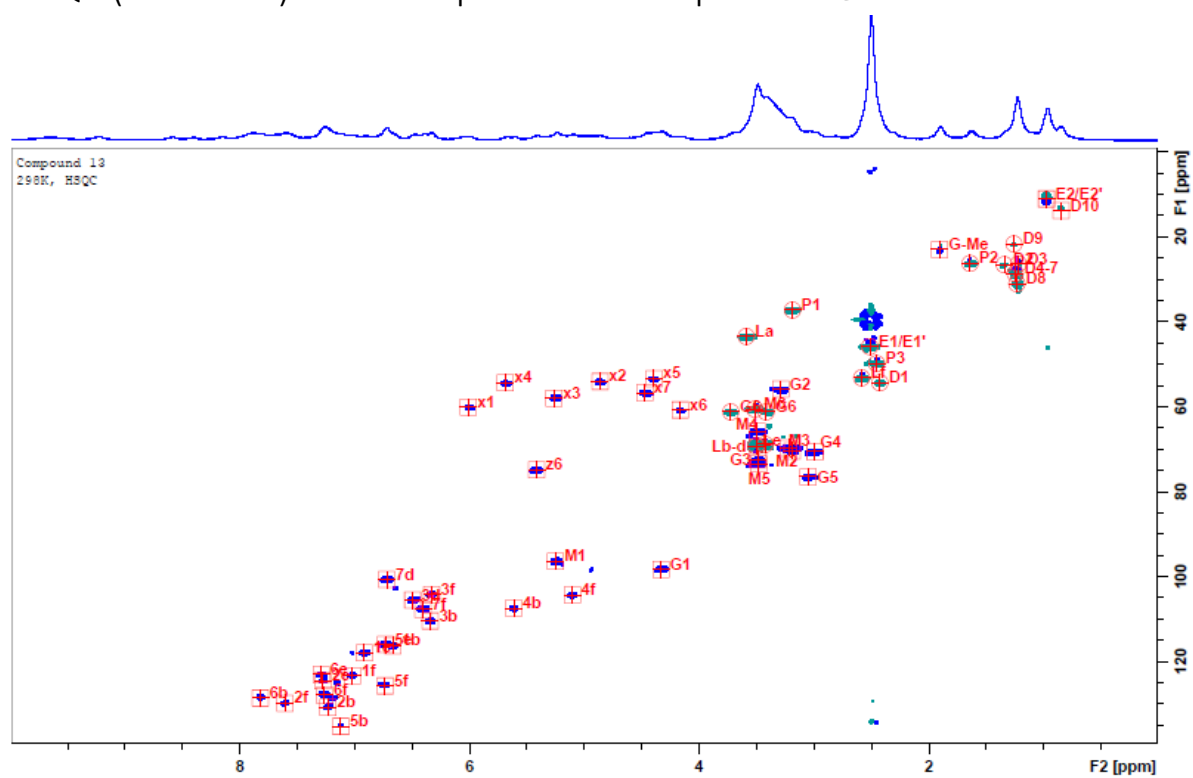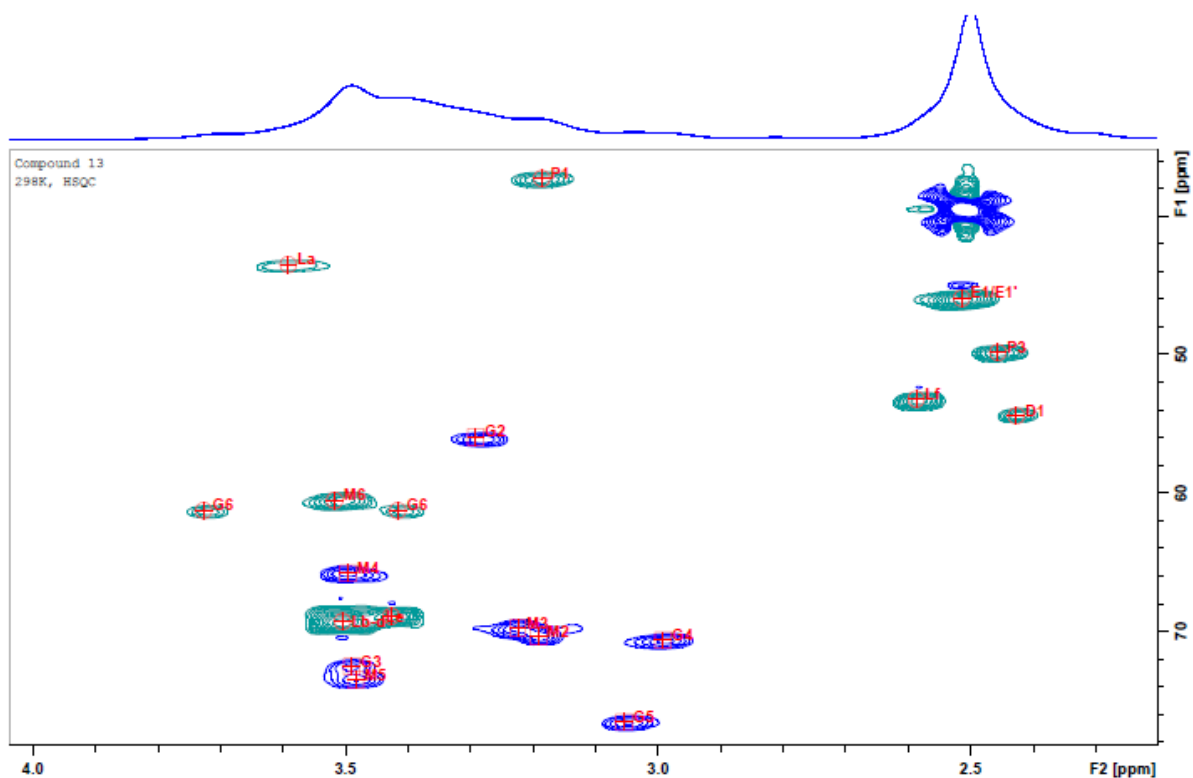

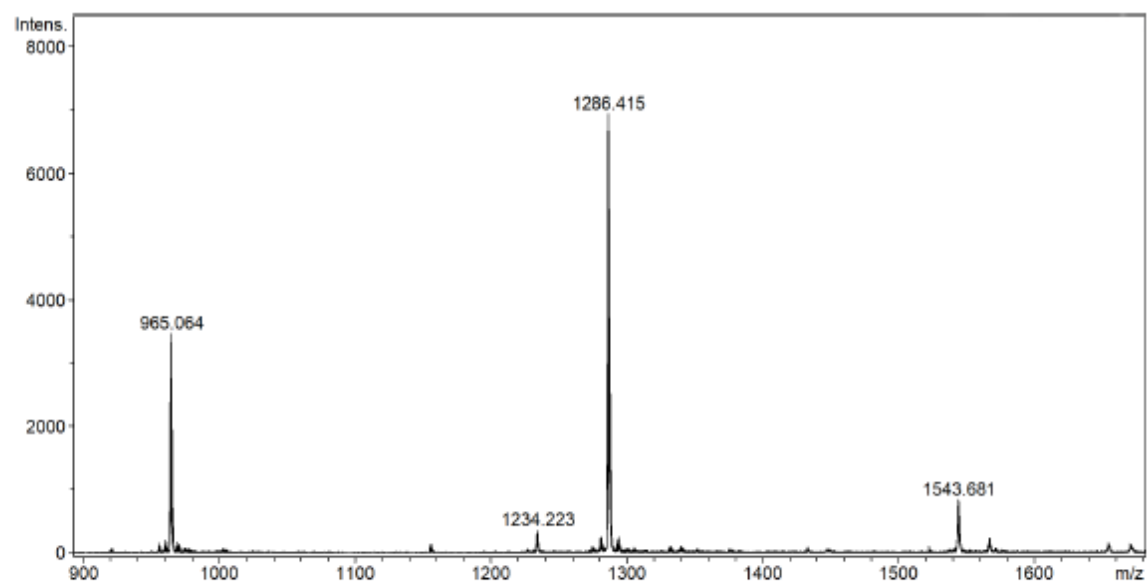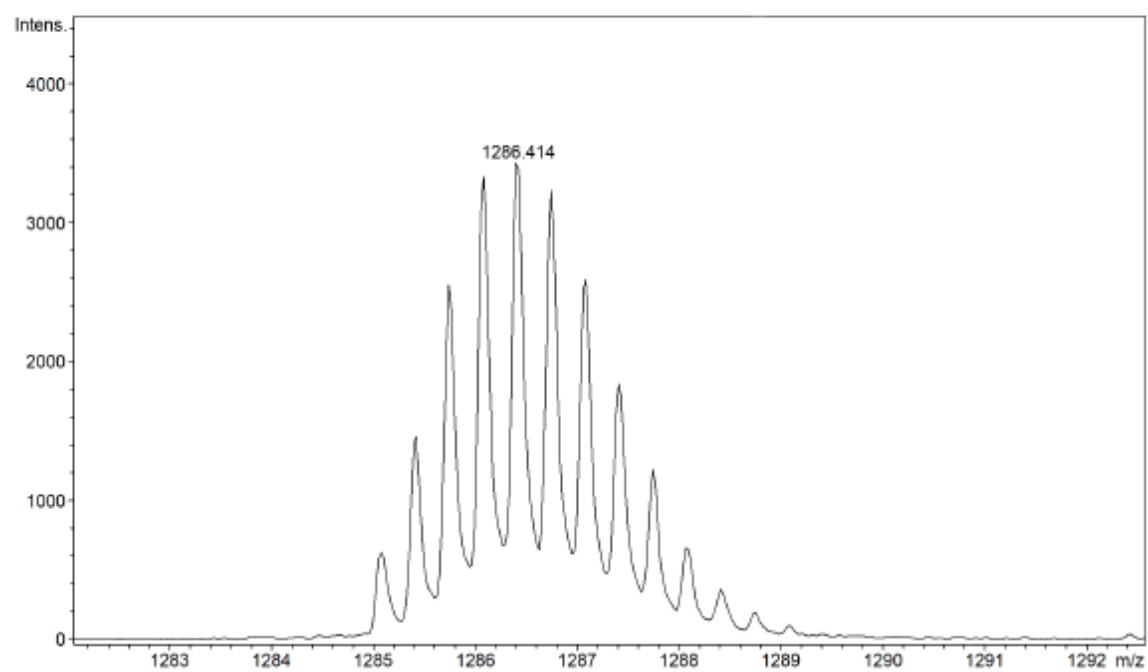

# MS spectrum of compound **14**

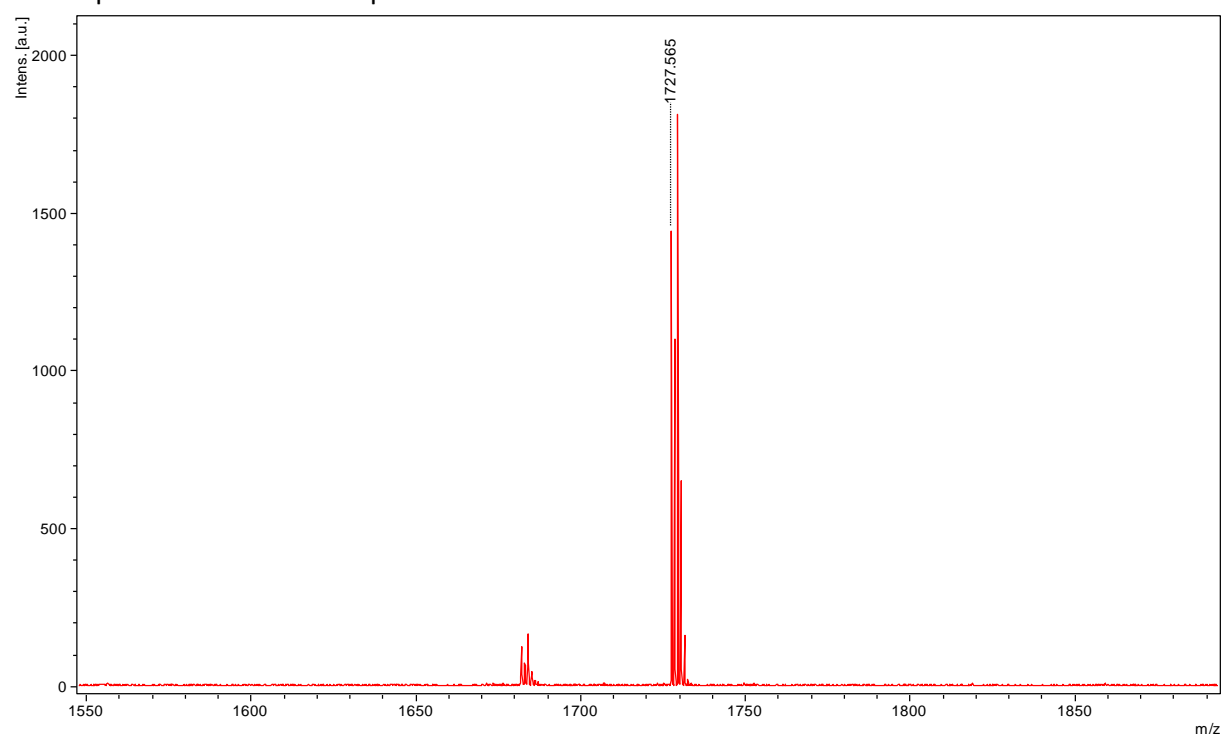

## HPLC-MS of compound **16**

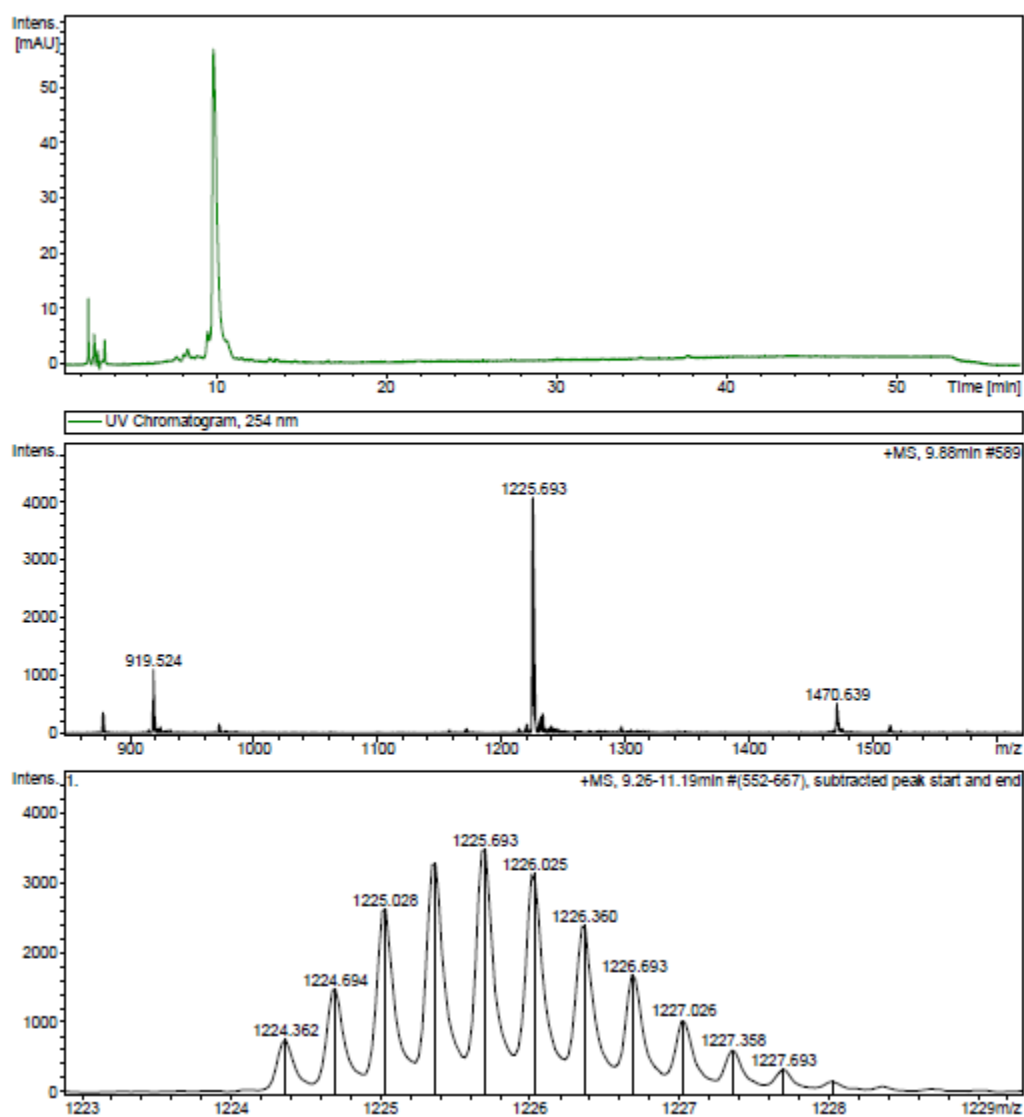

## HPLC-MS of compound 17

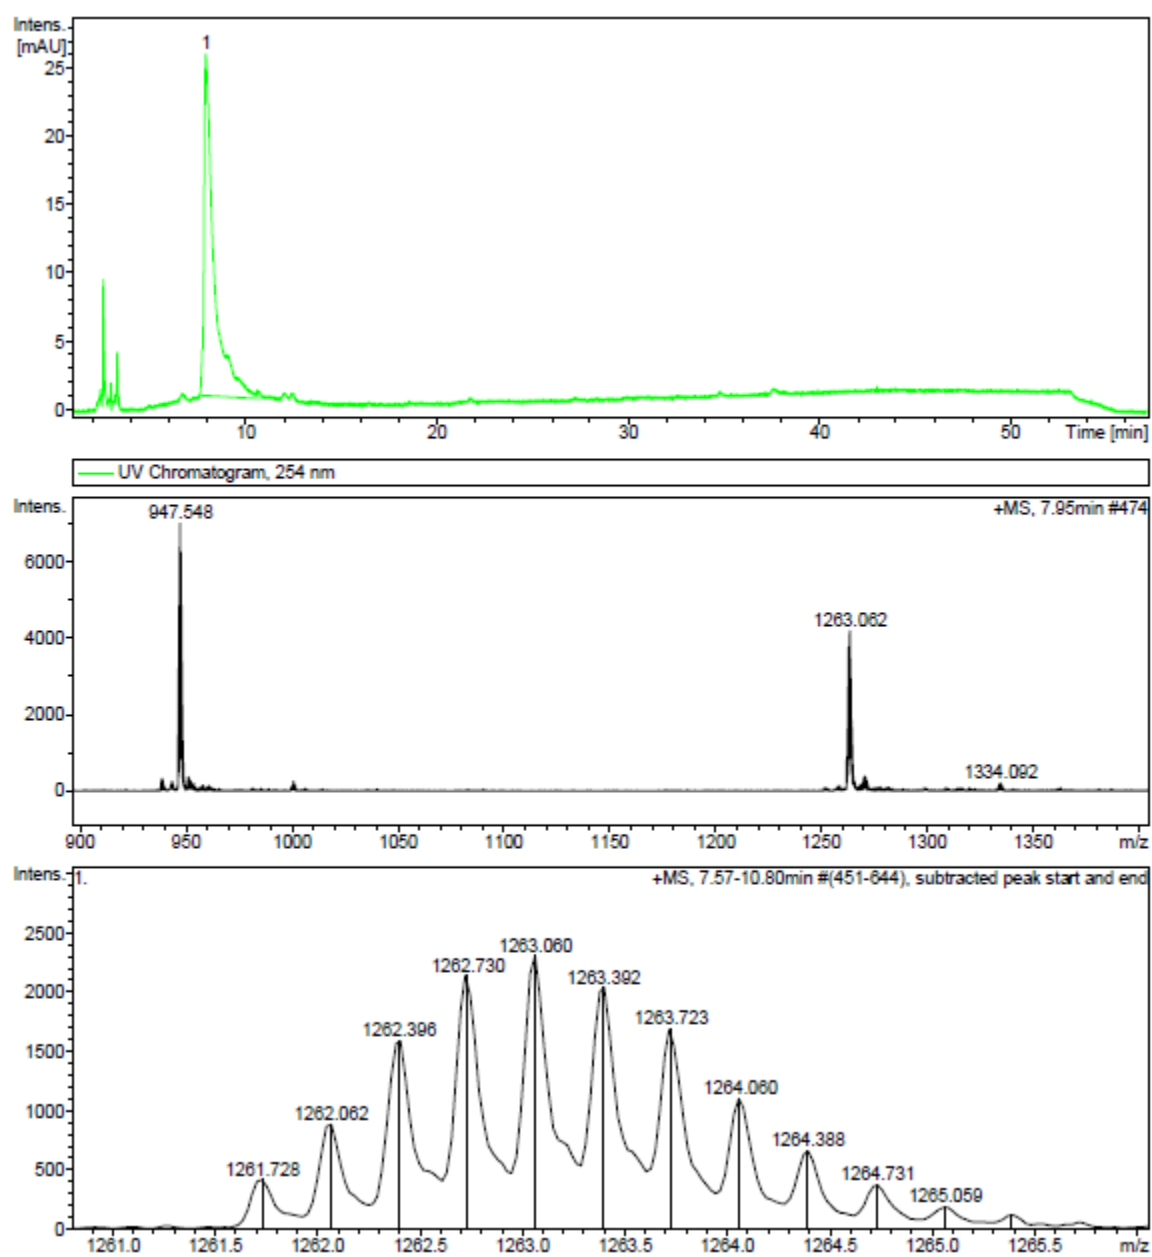

# MS spectrum of compound 20

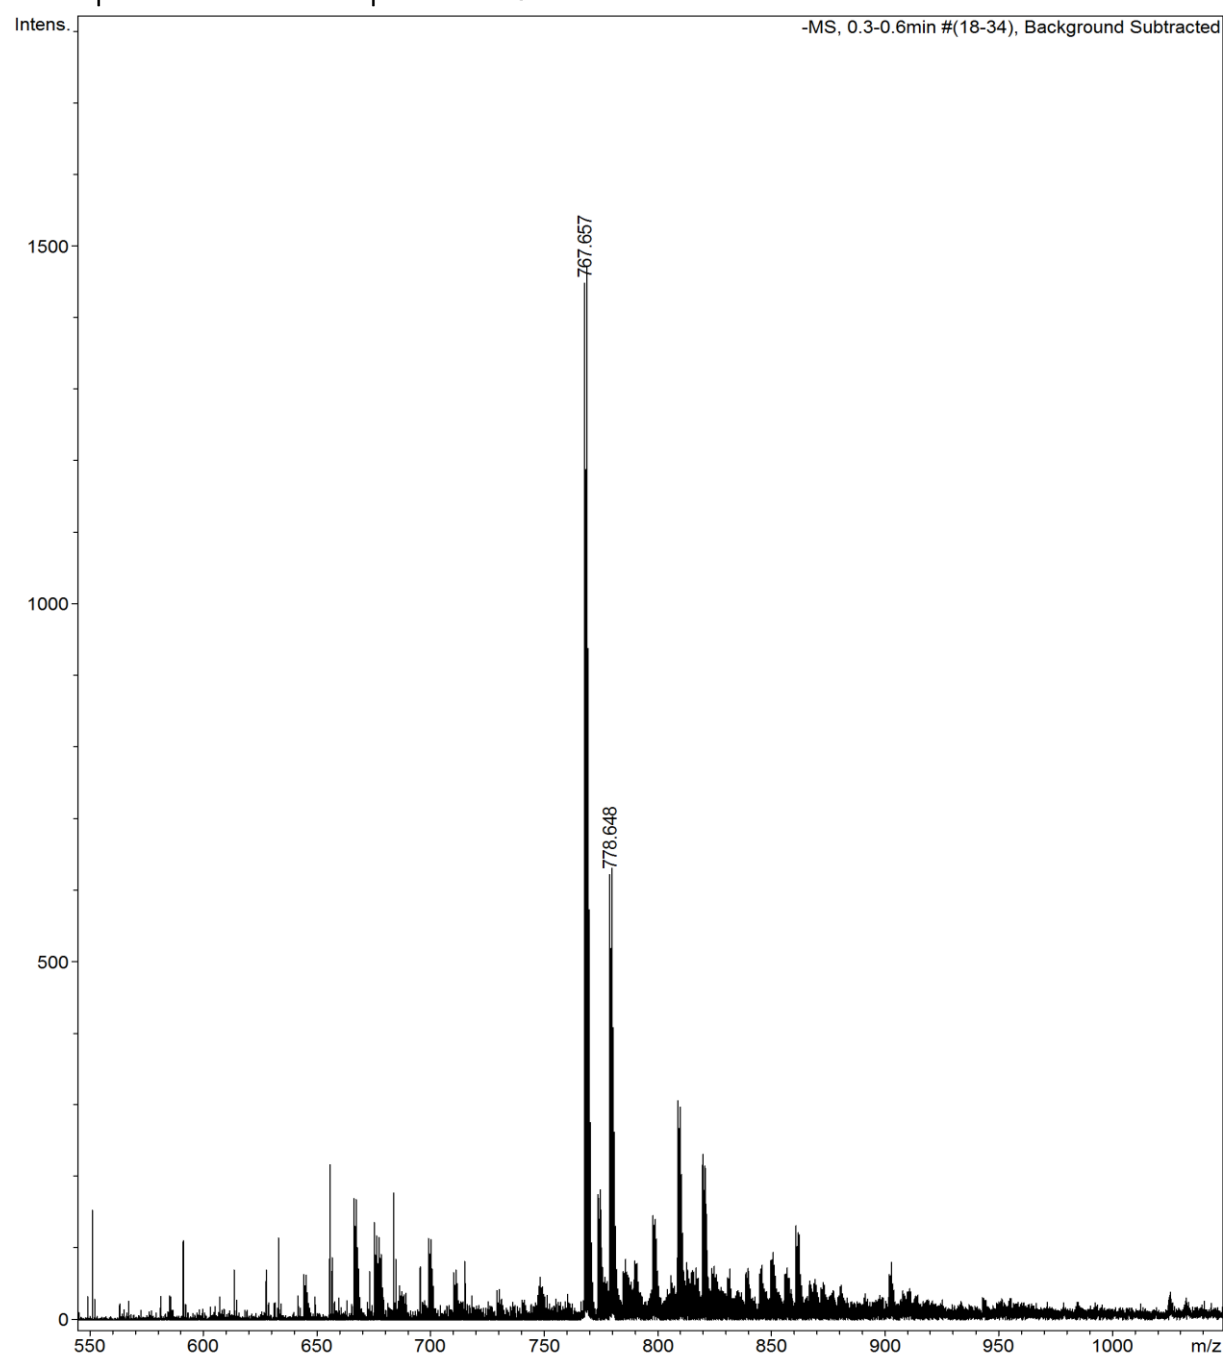

Supplement: s1 [file s1]
